# Supplementary material for: Development of a Well-Characterized Rhesus Macaque Model of Ebola Virus Disease for Support of Product Development
Source: MDPI journal article supplement (doi:10.3390/microorganisms9030489), 2021-02-26
Supplement: s1 [file s1]

**Table S1. Serum Viral Load Measured by qRT-PCR Assay, targeting Glycoprotein region (genome equivalents/mL)**

|                      | Animal ID | Day 0 | Day 3              | Day 4              | Day 5              | Day 6              | Day 7              | Day 9              | Day of Death |
|----------------------|-----------|-------|--------------------|--------------------|--------------------|--------------------|--------------------|--------------------|--------------|
| Scheduled Euthanasia | 028       | UD    | UD                 | N/A                | N/A                | N/A                | N/A                | N/A                | 3            |
|                      | 031       | UD    | UD                 | N/A                | N/A                | N/A                | N/A                | N/A                | 3            |
|                      | 081       | UD    | UD                 | N/A                | N/A                | N/A                | N/A                | N/A                | 3            |
|                      | 088       | UD    | UD                 | N/A                | N/A                | N/A                | N/A                | N/A                | 3            |
|                      | 027       | UD    | UD                 | $4.33 \times 10^3$ | N/A                | N/A                | N/A                | N/A                | 4            |
|                      | 030       | UD    | $3.91 \times 10^3$ | $2.60 \times 10^3$ | N/A                | N/A                | N/A                | N/A                | 4            |
|                      | 082       | UD    | UD                 | UD                 | N/A                | N/A                | N/A                | N/A                | 4            |
|                      | 087       | UD    | UD (p)             | $1.86 \times 10^4$ | N/A                | N/A                | N/A                | N/A                | 4            |
|                      | 026       | UD    | UD                 | $6.99 \times 10^3$ | $6.84 \times 10^5$ | N/A                | N/A                | N/A                | 5            |
|                      | 033       | UD    | $4.93 \times 10^3$ | $7.90 \times 10^4$ | $4.74 \times 10^6$ | N/A                | N/A                | N/A                | 5            |
|                      | 080       | UD    | UD (p)             | UD                 | UD                 | N/A                | N/A                | N/A                | 5            |
|                      | 086       | UD    | $1.48 \times 10^3$ | $4.30 \times 10^4$ | $1.35 \times 10^8$ | N/A                | N/A                | N/A                | 5            |
|                      | 024       | UD    | UD                 | $5.78 \times 10^3$ | $3.09 \times 10^6$ | $7.02 \times 10^7$ | N/A                | N/A                | 6            |
|                      | 035       | UD    | $5.20 \times 10^3$ | UD                 | $2.79 \times 10^7$ | $1.83 \times 10^8$ | N/A                | N/A                | 6            |
|                      | 083       | UD    | UD                 | $2.66 \times 10^3$ | $3.04 \times 10^5$ | UD                 | N/A                | N/A                | 6            |
|                      | 085       | UD    | UD                 | $2.14 \times 10^3$ | $1.67 \times 10^5$ | $1.37 \times 10^7$ | N/A                | N/A                | 6            |
| Unscheduled          | 029       | UD    | UD                 | $1.05 \times 10^5$ | $1.30 \times 10^8$ | $6.08 \times 10^8$ | $3.94 \times 10^8$ | N/A                | 7            |
|                      | 079       | UD    | $1.88 \times 10^3$ | $1.17 \times 10^5$ | $1.09 \times 10^8$ | $5.43 \times 10^8$ | N/A                | N/A                | 7 (FDIC)     |
|                      | 025       | UD    | UD (p)             | UD                 | $2.32 \times 10^4$ | $2.29 \times 10^7$ | N/A                | $1.21 \times 10^8$ | 9            |
|                      | 023       | UD    | UD                 | UD                 | $2.42 \times 10^5$ | $2.69 \times 10^7$ | N/A                | N/A                | 10 (FDIC)    |

UD – Undetermined, below assay detection limit (1,000 GE/mL); N/A - not applicable, animal deceased prior time point; FDIC – found dead in cage; (p) – plasma used instead of serum due to insufficient serum availability.
