# Supplementary material for: Development of a Well-Characterized Rhesus Macaque Model of Ebola Virus Disease for Support of Product Development
Source: MDPI journal article supplement (doi:10.3390/microorganisms9030489), 2021-02-26
Supplement: s1 [file s1]

**Table S3. Summary of Viral Load in Brain, Heart, Lung, and Exposure Site**

| Plaque forming units per gram of tissue |       |                        |                        |                        | Genome Equivalents per microgram of RNA |                        |                        |                        |                        |           |
|-----------------------------------------|-------|------------------------|------------------------|------------------------|-----------------------------------------|------------------------|------------------------|------------------------|------------------------|-----------|
| ID                                      | Brain | Heart                  | Lung                   | Exposure site (skin)   | Brain                                   | Heart                  | Lung                   | Exposure site (skin)   | Day of Death           |           |
| Scheduled Euthanasia                    | 028   | UD                     | UD                     | 2.50 x 10 <sup>1</sup> | 1.62 x 10 <sup>3</sup>                  | UD                     | 4.02 x 10 <sup>1</sup> | UD                     | 1.02 x 10 <sup>2</sup> | 3         |
|                                         | 031   | UD                     | UD                     | UD                     | UD                                      | 1.60 x 10 <sup>1</sup> | UD                     | UD                     | 3.53 x 10 <sup>5</sup> | 3         |
|                                         | 081   | UD                     | UD                     | UD                     | UD                                      | 2.43 x 10 <sup>1</sup> | 5.83 x 10 <sup>1</sup> | UD                     | 1.84 x 10 <sup>2</sup> | 3         |
|                                         | 088   | UD                     | UD                     | UD                     | UD                                      | 1.38 x 10 <sup>1</sup> | 8.60 x 10 <sup>1</sup> | UD                     | 9.83 x 10 <sup>2</sup> | 3         |
|                                         | 027   | UD                     | 3.05 x 10 <sup>1</sup> | 7.08 x 10 <sup>2</sup> | 1.35 x 10 <sup>3</sup>                  | UD                     | 4.54 x 10 <sup>2</sup> | UD                     | 1.38 x 10 <sup>3</sup> | 4         |
|                                         | 030   | UD                     | UD                     | UD                     | 8.27 x 10 <sup>1</sup>                  | 9.38 x 10 <sup>2</sup> | 7.67 x 10 <sup>2</sup> | UD                     | UD                     | 4         |
|                                         | 082   | UD                     | UD                     | UD                     | UD                                      | 1.82 x 10 <sup>1</sup> | 7.86 x 10 <sup>1</sup> | 2.14 x 10 <sup>1</sup> | 6.09 x 10 <sup>1</sup> | 4         |
|                                         | 087   | UD                     | UD                     | 2.42 x 10 <sup>2</sup> | 7.95 x 10 <sup>1</sup>                  | 2.60 x 10 <sup>1</sup> | 5.27 x 10 <sup>2</sup> | UD                     | 1.81 x 10 <sup>1</sup> | 4         |
|                                         | 026   | 1.95 x 10 <sup>2</sup> | 5.37 x 10 <sup>3</sup> | 2.69 x 10 <sup>4</sup> | 1.03 x 10 <sup>6</sup>                  | 1.83 x 10 <sup>2</sup> | 1.63 x 10 <sup>3</sup> | UD                     | 4.05 x 10 <sup>6</sup> | 5         |
|                                         | 033   | 6.85 x 10 <sup>4</sup> | 4.72 x 10 <sup>5</sup> | 1.13 x 10 <sup>7</sup> | 1.50 x 10 <sup>7</sup>                  | 7.25 x 10 <sup>3</sup> | 7.18 x 10 <sup>5</sup> | UD                     | 7.89 x 10 <sup>6</sup> | 5         |
|                                         | 080   | UD                     | 2.66 x 10 <sup>1</sup> | UD                     | UD                                      | 3.48 X 10 <sup>1</sup> | 1.03 x 10 <sup>2</sup> | UD                     | 1.69 x 10 <sup>1</sup> | 5         |
|                                         | 086   | 4.77 x 10 <sup>4</sup> | 3.24 x 10 <sup>5</sup> | 1.50 x 10 <sup>6</sup> | 3.93 x 10 <sup>6</sup>                  | 1.05 x 10 <sup>4</sup> | 1.42 x 10 <sup>5</sup> | UD                     | 1.02 x 10 <sup>6</sup> | 5         |
|                                         | 024   | UD                     | 4.25 x 10 <sup>4</sup> | 6.71 x 10 <sup>5</sup> | 8.99 x 10 <sup>5</sup>                  | 2.54 x 10 <sup>3</sup> | 5.66 x 10 <sup>4</sup> | UD                     | 1.72 x 10 <sup>4</sup> | 6         |
|                                         | 035   | 1.51 x 10 <sup>4</sup> | 9.08 x 10 <sup>7</sup> | 1.52 x 10 <sup>6</sup> | 1.10 x 10 <sup>7</sup>                  | 1.41 x 10 <sup>4</sup> | 6.37 x 10 <sup>4</sup> | UD                     | 8.80 x 10 <sup>6</sup> | 6         |
|                                         | 083   | 9.84 x 10 <sup>2</sup> | 9.96 x 10 <sup>4</sup> | 2.50 x 10 <sup>5</sup> | 2.41 x 10 <sup>3</sup>                  | 1.01 x 10 <sup>3</sup> | 9.93 x 10 <sup>3</sup> | 3.60 x 10 <sup>2</sup> | 8.38 x 10 <sup>5</sup> | 6         |
|                                         | 085   | 4.83 x 10 <sup>2</sup> | 7.16 x 10 <sup>4</sup> | 1.42 x 10 <sup>5</sup> | 9.35 x 10 <sup>1</sup>                  | 8.01 x 10 <sup>2</sup> | 1.93 x 10 <sup>4</sup> | UD                     | 1.42 x 10 <sup>3</sup> | 6         |
| Unscheduled                             | 029   | 2.51 x 10 <sup>6</sup> | 9.70 x 10 <sup>5</sup> | 3.56 x 10 <sup>7</sup> | 9.80 x 10 <sup>5</sup>                  | 2.29 x 10 <sup>5</sup> | 4.18 x 10 <sup>5</sup> | UD                     | 2.93 x 10 <sup>4</sup> | 7         |
|                                         | 079   | 7.50 x 10 <sup>5</sup> | 3.36 x 10 <sup>6</sup> | 1.17 x 10 <sup>7</sup> | 1.29 x 10 <sup>5</sup>                  | 3.12 x 10 <sup>5</sup> | 1.01 x 10 <sup>5</sup> | 3.02 x 10 <sup>1</sup> | 8.99 x 10 <sup>3</sup> | 7 (FDIC)  |
|                                         | 025   | 4.76 x 10 <sup>4</sup> | 7.78 x 10 <sup>4</sup> | 1.23 x 10 <sup>6</sup> | 2.10 x 10 <sup>6</sup>                  | 5.70 x 10 <sup>3</sup> | 9.36 x 10 <sup>4</sup> | 1.29 x 10 <sup>3</sup> | 1.93 x 10 <sup>5</sup> | 9         |
|                                         | 023   | 7.34 x 10 <sup>5</sup> | 3.78 x 10 <sup>6</sup> | 7.00 x 10 <sup>6</sup> | 4.62 x 10 <sup>5</sup>                  | 2.39 x 10 <sup>4</sup> | 2.02 x 10 <sup>5</sup> | UD                     | 4.39 x 10 <sup>2</sup> | 10 (FDIC) |

\*UD – Undetermined; Assay detection limits – 25 PFU/g and 10 GE/μg of RNA.
