# Supplementary material for: Development of a Well-Characterized Rhesus Macaque Model of Ebola Virus Disease for Support of Product Development
Source: MDPI journal article supplement (doi:10.3390/microorganisms9030489), 2021-02-26
Supplement: s1 [file s1]

**Table S4. Individual Animal Gross Necropsy Findings**

|                |                                 | SE, Day 3 |     |     |     |     | SE, Day 4 |     |     |     | SE, Day 5 |     |     |     | SE, Day 6 |     |     |     | US (Days 7 to 9) |     |    |  |  |
|----------------|---------------------------------|-----------|-----|-----|-----|-----|-----------|-----|-----|-----|-----------|-----|-----|-----|-----------|-----|-----|-----|------------------|-----|----|--|--|
| Tissue         | Description                     | 028       | 031 | 081 | 088 | 027 | 030       | 082 | 087 | 026 | 033       | 080 | 086 | 024 | 035       | 083 | 085 | 023 | 025              | 029 | 79 |  |  |
| Skin           | Petechial rash                  |           |     |     |     |     |           |     |     |     | X         |     | X   | X   | X         | X   | X   | X   | X                |     | X  |  |  |
| Challenge site | Rash                            |           |     |     |     |     |           |     |     | X   |           |     |     |     | X         |     |     | X   |                  |     |    |  |  |
| Inguinal LN    | Enlarged                        |           |     |     |     |     |           |     |     |     |           |     |     | X   | X         |     |     | X   | X                |     | X  |  |  |
|                | Dark                            | X         | X   |     | X   | X   |           |     |     | X   | X         |     |     | X   |           |     |     |     |                  | X   |    |  |  |
|                | Firm                            |           | X   | X   | X   | X   | X         |     |     | X   | X         |     |     | X   | X         | X   |     | X   | X                | X   |    |  |  |
| Axillary LN    | Enlarged                        |           |     |     |     |     |           | X   | X   | X   |           | X   | X   | X   | X         | X   | X   | X   | X                | X   | X  |  |  |
|                | Dark                            | X         | X   |     | X   | X   |           |     |     | X   | X         |     |     | X   |           |     |     |     |                  | X   |    |  |  |
|                | Firm                            | X         | X   |     | X   | X   | X         |     |     | X   | X         |     |     | X   | X         |     | X   | X   | X                | X   |    |  |  |
| Mediastinal LN | Firm                            |           |     |     | X   | X   |           |     |     |     | X         |     |     | X   |           | X   |     | X   | X                | X   |    |  |  |
|                | Enlarged                        |           |     |     |     |     |           |     |     |     |           |     |     | X   |           | X   |     | X   |                  |     |    |  |  |
| Spleen         | Enlarged                        |           |     |     |     |     |           |     |     | X   | X         |     | X   |     | X         | X   |     | X   | X                | X   | X  |  |  |
|                | Firm                            |           |     |     | X   |     | X         |     |     | X   |           |     |     |     | X         | X   | X   | X   | X                | X   | X  |  |  |
|                | Rounded                         |           |     |     | X   |     | X         |     |     | X   |           |     |     |     | X         | X   |     |     | X                | X   | X  |  |  |
| Liver          | Pale                            |           |     |     |     |     |           |     |     |     | X         |     |     | X   | X         |     |     |     | X                | X   | X  |  |  |
|                | Friable                         |           |     |     |     |     |           |     |     |     |           |     |     |     |           |     |     | X   |                  |     | X  |  |  |
| Adrenal gland  | Enlarged                        |           |     |     |     |     |           |     |     |     |           |     |     |     |           |     |     | X   |                  | X   |    |  |  |
| Kidney         | Red                             |           |     |     |     |     |           |     |     |     |           |     |     |     |           |     |     | X   | X                |     |    |  |  |
| Mesenteric LN  | Firm                            |           |     |     |     |     |           |     |     |     |           |     |     |     |           | X   |     |     |                  |     | X  |  |  |
|                | Enlarged                        |           |     |     |     |     |           |     |     | X   |           |     |     |     | X         |     |     |     | X                |     |    |  |  |
| GI tract       | Red mucosa or red foci, stomach |           |     |     |     |     | X         |     |     |     |           |     |     |     |           |     |     | X   |                  |     |    |  |  |
|                | Red mucosa, duodenum            |           |     |     |     |     |           |     |     |     |           |     | X   | X   |           |     |     | X   |                  |     |    |  |  |
|                | Red mucosa, colon               |           |     |     |     |     |           |     |     |     |           |     |     |     |           |     |     |     | X                | X   | X  |  |  |
|                | Blood in lumen, rectum          |           | X   |     |     |     | X         |     |     | X   | X         |     |     |     |           |     |     | X   | X                | X   | X  |  |  |
| Bladder        | Petechia or red mucosa          |           |     |     |     |     |           |     |     | X   |           |     |     |     |           |     |     | X   |                  | X   |    |  |  |
| Testicle       | Blood                           |           | NA  | NA  |     |     | NA        | NA  |     |     | NA        | NA  |     |     | NA        | NA  |     | X   | X                | NA  | NA |  |  |
| Uterus         | Blood in lumen                  | NA        |     |     | NA  | NA  |           |     | NA  | NA  |           |     | NA  | NA  |           |     | NA  | NA  | NA               | X   | X  |  |  |

SE: Scheduled euthanasia; US: unscheduled death; GI: Gastrointestinal; X: finding was present at time of necropsy; NA: not applicable, organ not present due to animal sex.
