# Supplementary material for: Development of a Well-Characterized Rhesus Macaque Model of Ebola Virus Disease for Support of Product Development
Source: MDPI journal article supplement (doi:10.3390/microorganisms9030489), 2021-02-26
Supplement: s1 [file s1]

**Table S2. Summary of Viral Load in Spleen, Liver, Kidney, and Adrenal Gland**

| Plaque forming units per gram of tissue |     |                    |                    |                    |                    | Genome Equivalents per microgram of RNA |                    |                    |                    |              |
|-----------------------------------------|-----|--------------------|--------------------|--------------------|--------------------|-----------------------------------------|--------------------|--------------------|--------------------|--------------|
|                                         | ID  | Spleen             | Liver              | Kidney             | Adrenal Gland      | Spleen                                  | Liver              | Kidney             | Adrenal Gland      | Day of Death |
| Scheduled Euthanasia                    | 028 | $7.38 \times 10^2$ | $3.00 \times 10^2$ | UD                 | UD                 | $1.38 \times 10^3$                      | $2.47 \times 10^2$ | $1.78 \times 10^1$ | $2.48 \times 10^1$ | 3            |
|                                         | 031 | $1.25 \times 10^2$ | UD                 | UD                 | UD                 | $2.24 \times 10^3$                      | $6.82 \times 10^2$ | $4.04 \times 10^1$ | $1.43 \times 10^1$ | 3            |
|                                         | 081 | $4.00 \times 10^2$ | UD                 | UD                 | UD                 | $7.83 \times 10^2$                      | $1.08 \times 10^2$ | $2.00 \times 10^2$ | $2.03 \times 10^2$ | 3            |
|                                         | 088 | UD                 | UD                 | UD                 | UD                 | $9.77 \times 10^1$                      | $2.12 \times 10^1$ | UD                 | $1.74 \times 10^1$ | 3            |
|                                         | 027 | $4.79 \times 10^4$ | $3.00 \times 10^3$ | UD                 | UD                 | $9.28 \times 10^3$                      | $2.10 \times 10^3$ | $3.76 \times 10^1$ | $8.38 \times 10^1$ | 4            |
|                                         | 030 | $1.26 \times 10^6$ | $5.88 \times 10^4$ | $1.03 \times 10^2$ | $3.75 \times 10^2$ | $1.23 \times 10^5$                      | $1.09 \times 10^5$ | $2.16 \times 10^2$ | $3.08 \times 10^3$ | 4            |
|                                         | 082 | $5.06 \times 10^4$ | UD                 | UD                 | UD                 | $4.88 \times 10^4$                      | $4.59 \times 10^3$ | $1.75 \times 10^2$ | $2.22 \times 10^2$ | 4            |
|                                         | 087 | $8.46 \times 10^5$ | $5.25 \times 10^5$ | UD¥                | $2.25 \times 10^4$ | $1.04 \times 10^6$                      | $1.49 \times 10^5$ | $7.30 \times 10^2$ | $1.05 \times 10^4$ | 4            |
|                                         | 026 | $6.79 \times 10^6$ | $6.88 \times 10^6$ | $7.68 \times 10^2$ | $7.50 \times 10^4$ | $1.32 \times 10^6$                      | $2.05 \times 10^5$ | $1.40 \times 10^3$ | $3.43 \times 10^4$ | 5            |
|                                         | 033 | $5.63 \times 10^8$ | $3.69 \times 10^7$ | $3.52 \times 10^6$ | $1.11 \times 10^7$ | $7.23 \times 10^6$                      | $9.68 \times 10^7$ | $2.08 \times 10^5$ | $1.45 \times 10^6$ | 5            |
|                                         | 080 | $3.13 \times 10^6$ | $5.38 \times 10^5$ | UD                 | UD                 | $6.61 \times 10^5$                      | $2.41 \times 10^5$ | $6.27 \times 10^2$ | $1.84 \times 10^3$ | 5            |
|                                         | 086 | $8.83 \times 10^7$ | $2.17 \times 10^7$ | $6.37 \times 10^5$ | $1.34 \times 10^6$ | $3.72 \times 10^6$                      | $2.74 \times 10^6$ | $2.37 \times 10^5$ | $6.30 \times 10^5$ | 5            |
|                                         | 024 | $5.00 \times 10^7$ | $8.16 \times 10^6$ | UD                 | $1.64 \times 10^6$ | $3.29 \times 10^6$                      | $6.42 \times 10^6$ | $2.54 \times 10^4$ | $2.28 \times 10^5$ | 6            |
|                                         | 035 | $1.50 \times 10^7$ | $1.62 \times 10^7$ | $9.46 \times 10^5$ | $1.09 \times 10^6$ | $2.96 \times 10^6$                      | $2.90 \times 10^6$ | $5.58 \times 10^4$ | $5.15 \times 10^5$ | 6            |
|                                         | 083 | $6.06 \times 10^7$ | $5.56 \times 10^6$ | $8.99 \times 10^4$ | $9.58 \times 10^5$ | $1.60 \times 10^6$                      | $2.82 \times 10^6$ | $1.89 \times 10^4$ | $2.59 \times 10^5$ | 6            |
|                                         | 085 | $8.06 \times 10^6$ | $8.04 \times 10^6$ | $5.95 \times 10^4$ | $8.00 \times 10^5$ | $7.33 \times 10^6$                      | $1.95 \times 10^6$ | $1.54 \times 10^4$ | $3.23 \times 10^5$ | 6            |
| Unscheduled                             | 029 | $6.88 \times 10^7$ | $6.21 \times 10^7$ | $8.12 \times 10^3$ | $5.71 \times 10^6$ | $1.70 \times 10^8$                      | $1.21 \times 10^8$ | $1.26 \times 10^5$ | $2.51 \times 10^6$ | 7            |
|                                         | 079 | $1.79 \times 10^7$ | $4.75 \times 10^7$ | $4.96 \times 10^6$ | $4.67 \times 10^5$ | $1.61 \times 10^8$                      | $1.51 \times 10^8$ | $3.53 \times 10^5$ | $2.59 \times 10^6$ | 7 (FDIC)     |
|                                         | 025 | $9.63 \times 10^6$ | $7.00 \times 10^6$ | $2.73 \times 10^6$ | $6.81 \times 10^5$ | $3.47 \times 10^6$                      | $2.81 \times 10^5$ | $1.25 \times 10^5$ | $2.09 \times 10^5$ | 9            |
|                                         | 023 | $3.83 \times 10^6$ | $1.94 \times 10^7$ | $8.78 \times 10^6$ | $3.28 \times 10^6$ | $8.31 \times 10^7$                      | $1.42 \times 10^6$ | $1.74 \times 10^6$ | $2.83 \times 10^6$ | 10 (FDIC)    |

UD – Undetermined; Assay detection limits – 25 PFU/g and 10 GE/ $\mu$ g of RNA.
